# Supplementary material
Source: PubMed Central journal article supplement (PMC4304440)
Supplement: ja511313k_si_001.pdf [file ja511313k_si_001.pdf]

## **Supporting Information**

### **Single $^{19}\text{F}$ probe for simultaneous detection of multiple metal ions using miCEST MRI**

Amnon Bar-Shir<sup>1,2</sup>, Nirbhay N. Yadav<sup>1,6</sup>, Assaf A. Gilad<sup>1,2,6</sup>, Peter C.M. van Zijl<sup>1,6</sup>,  
Michael T. McMahon<sup>1,6</sup>, and Jeff W.M. Bulte<sup>1-6</sup>

<sup>1</sup>Russell H. Morgan Dept. of Radiology and Radiological Science,  
Division of MR Research, <sup>2</sup>Cellular Imaging Section and Vascular Biology Program, Institute for  
Cell Engineering, <sup>3</sup>Dept. of Chemical & Biomolecular Engineering, <sup>4</sup>Dept of Biomedical  
Engineering, <sup>5</sup>Dept of Oncology, The Johns Hopkins University School of Medicine.  
<sup>6</sup>F.M. Kirby Research Center for Functional Brain Imaging, Kennedy Krieger Institute,  
Baltimore, Maryland, USA

### ***Experimental Section***

Sample preparation: TF-BAPTA (AG Scientific, Inc.) was dissolved in 20 mM Hepes buffer to a final concentration of either 5 mM (NMR experiments) or 10 mM (MRI experiments). The pH was adjusted to 7.4 by titration with 1 N HCl or 1 N NaOH. Stock solutions of the salts  $\text{CaCl}_2$ ,  $\text{MgCl}_2$ ,  $\text{ZnCl}_2$ ,  $\text{FeSO}_4$ , NaCl, and KCl were prepared in 20 mM Hepes buffer and used to prepare sample solutions containing TF-BAPTA and ions, with a molar ratio of 10:1 or 50:1 TF-BAPTA:ion for the NMR and MRI experiments, respectively. For experiments performed in the presence of physiological ions, Hank's Balanced Salt Solution (HBSS) containing 1.3 mM  $\text{Ca}^{2+}$ , 0.9 mM  $\text{Mg}^{2+}$ , 5.9 mM  $\text{K}^+$ , 143 mM  $\text{Na}^+$ , and 6 mM glucose was used instead of Hepes buffer.

$^{19}\text{F}$  NMR experiments:  $^{19}\text{F}$  NMR spectra were acquired using an 11.7 T NMR scanner (Bruker Biospec system) equipped with a two channel ( $^1\text{H}/^{19}\text{F}$ , and  $^2\text{H}$  for lock, broad band) rf coil. A volume of 0.5 mL of each sample was transferred into 5 mm NMR tubes with 0.5 mM added 5-FluoroCytosine (5-FC) and 50  $\mu\text{L}$   $\text{D}_2\text{O}$ . The 5-FC was assigned as an internal  $^{19}\text{F}$  reference with a fixed frequency of -47.0 ppm.  $\text{D}_2\text{O}$  was used for signal lock.

MRI experiments: MRI experiments were performed on a vertical 17.6 T scanner (Bruker Avance system) with the temperature controlled at 37°C. A 20 mm birdcage radiofrequency coil was used to acquire both  $^1\text{H}$  and  $^{19}\text{F}$  MR images by sweeping the coil frequency from the proton (750 MHz) to the fluorine (705.5 MHz) frequency. For  $^1\text{H}$  MRI, a rapid acquisition with relaxation enhancement (RARE) sequence was used with

the following parameters: Repetition time (TR)/echo time (TE)=5,000/7.7 ms; RARE factor=8; 1 mm slice thickness; FOV=2.0×2.0 cm; matrix size=128×128; resolution=0.156×0.156 mm; and one average (NA=1). For  $^{19}\text{F}$  iCEST MRI, the center frequency ( $\omega_1$ ) was set at the frequency of the  $^{19}\text{F}$  atom at the 6 position (0.0 ppm) of TF-BAPTA (**Figure 1a**), while signal from the  $^{19}\text{F}$  located at the 5 position of TF-BAPTA (**Figure 1a,b**, 4.5 ppm downfield) was suppressed using a spectrally selective excitation pulse and spoiler gradient. A modified RARE sequence (TR/TE=4,000/3.4 ms, RARE factor=16, 6 mm slice, FOV=2×2 cm, matrix size=32×32, resolution=0.625×0.625 mm, NA=8 and a saturation pulse  $B_1=1.2, 2.4$  or  $3.6 \mu\text{T} / 2$  s) was used to acquire  $^{19}\text{F}$  iCEST data. Mean  $^{19}\text{F}$  iCEST spectra were obtained after  $B_0$  correction. The CEST contrast was calculated after Lorentzian line shape fitting of the signal from each voxel in the image.

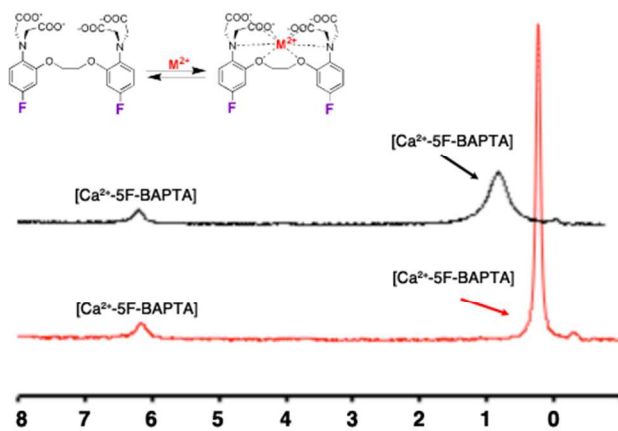

**Figure S1.** Chemical structure of 5F-BAPTA and  $^{19}\text{F}$ -NMR spectra of 5 mM 5F-BAPTA in the presence of 0.5 mM  $\text{Ca}^{2+}$  with (black spectrum) and without (red spectrum) the addition of 1 mM  $\text{Mg}^{2+}$ .

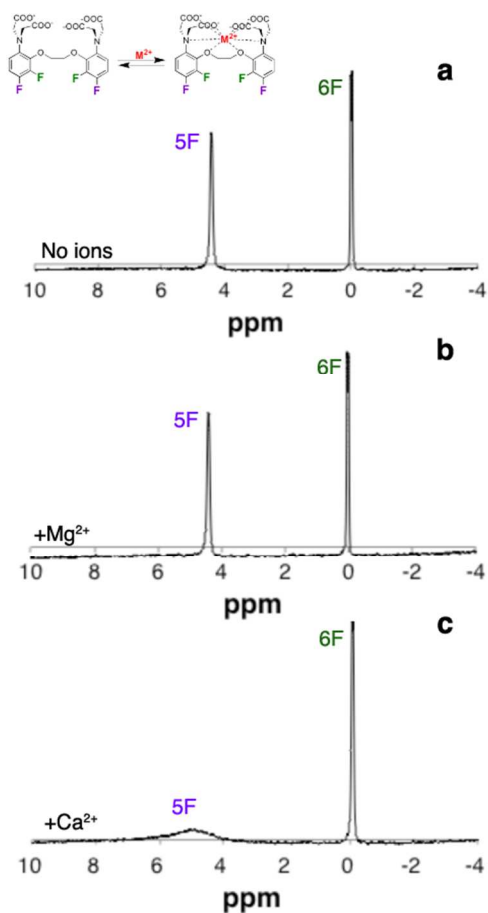

**Figure S2.** Chemical structure of TF-BAPTA and  $^{19}\text{F}$  NMR spectra of 5 mM TF-BAPTA alone (a), in the presence of  $0.5\text{ mM Mg}^{2+}$  (b), or in the presence of  $0.5\text{ mM Ca}^{2+}$  (c).

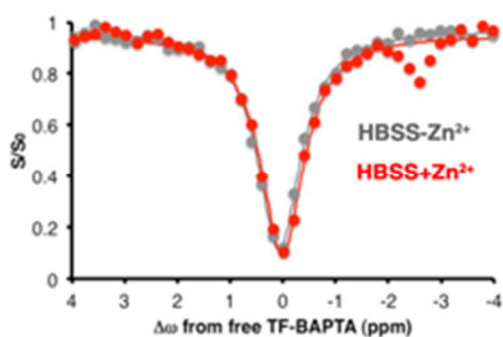

**Figure S3.** iCEST spectra for TF-BAPTA (10 mM) at HBSS (pH=7.2, 1.3 mM  $\text{Ca}^{2+}$ , 0.9 mM  $\text{Mg}^{2+}$ , 5.9 mM  $\text{K}^{+}$ , 143 mM  $\text{Na}^{+}$ , 5.6 mM glucose) without (gray iCEST spectrum) and with addition of 200  $\mu\text{M}$  of  $\text{Zn}^{2+}$  (red iCEST spectrum).
